# Supplementary material
Source: Springer Nature journal article supplement (https://www.springermedizin.de/resource/supplementary/13054_2012_946_MOESM1_ESM.pdf/9709616)

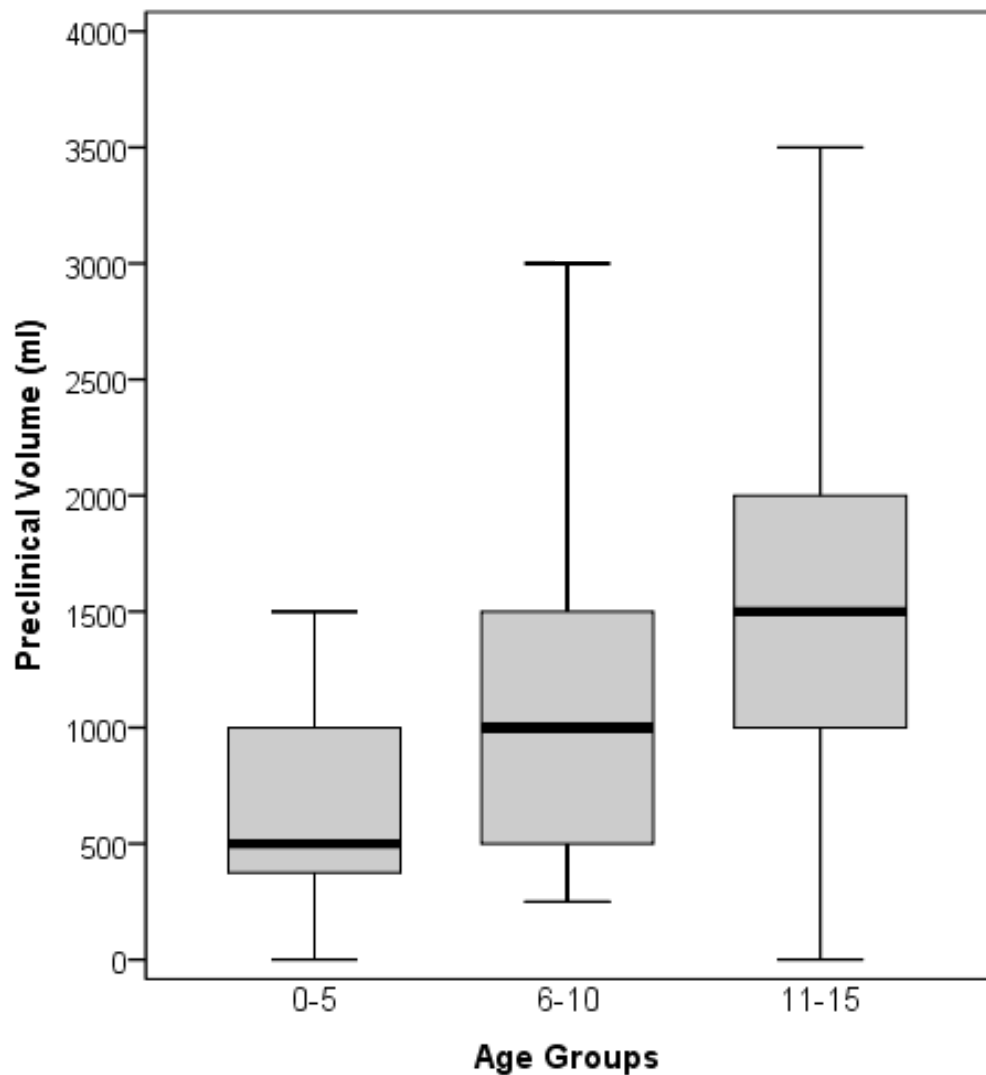

Supplement: MOESM1 [file 9709616]
